# Supplementary material for: Determination of riboflavin based on fluorescence quenching by graphene dispersions in polyethylene glycol
Source: Royal Society of Chemistry journal article supplement (doi:10.1039/c5ra25547c), 2016-01-01
Supplement: c5ra25547c1.pdf [file c5ra25547c1.pdf]

## Electronic Supplementary Information

### Determination of Riboflavin Based on Fluorescence Quenching by Graphene Dispersions in Polyethylene Glycol

Ana María Díez-Pascual,\* Diego García-García, María Paz San Andrés, Soledad Vera

*Analytical Chemistry, Physical Chemistry and Chemical Engineering Department, Faculty of Biology, Environmental Sciences and Chemistry, Alcalá University, E-28871 Alcalá de Henares, Madrid, Spain*

\* Corresponding author. [am.diez@uah.es](mailto:am.diez@uah.es) (A. M. Díez-Pascual)

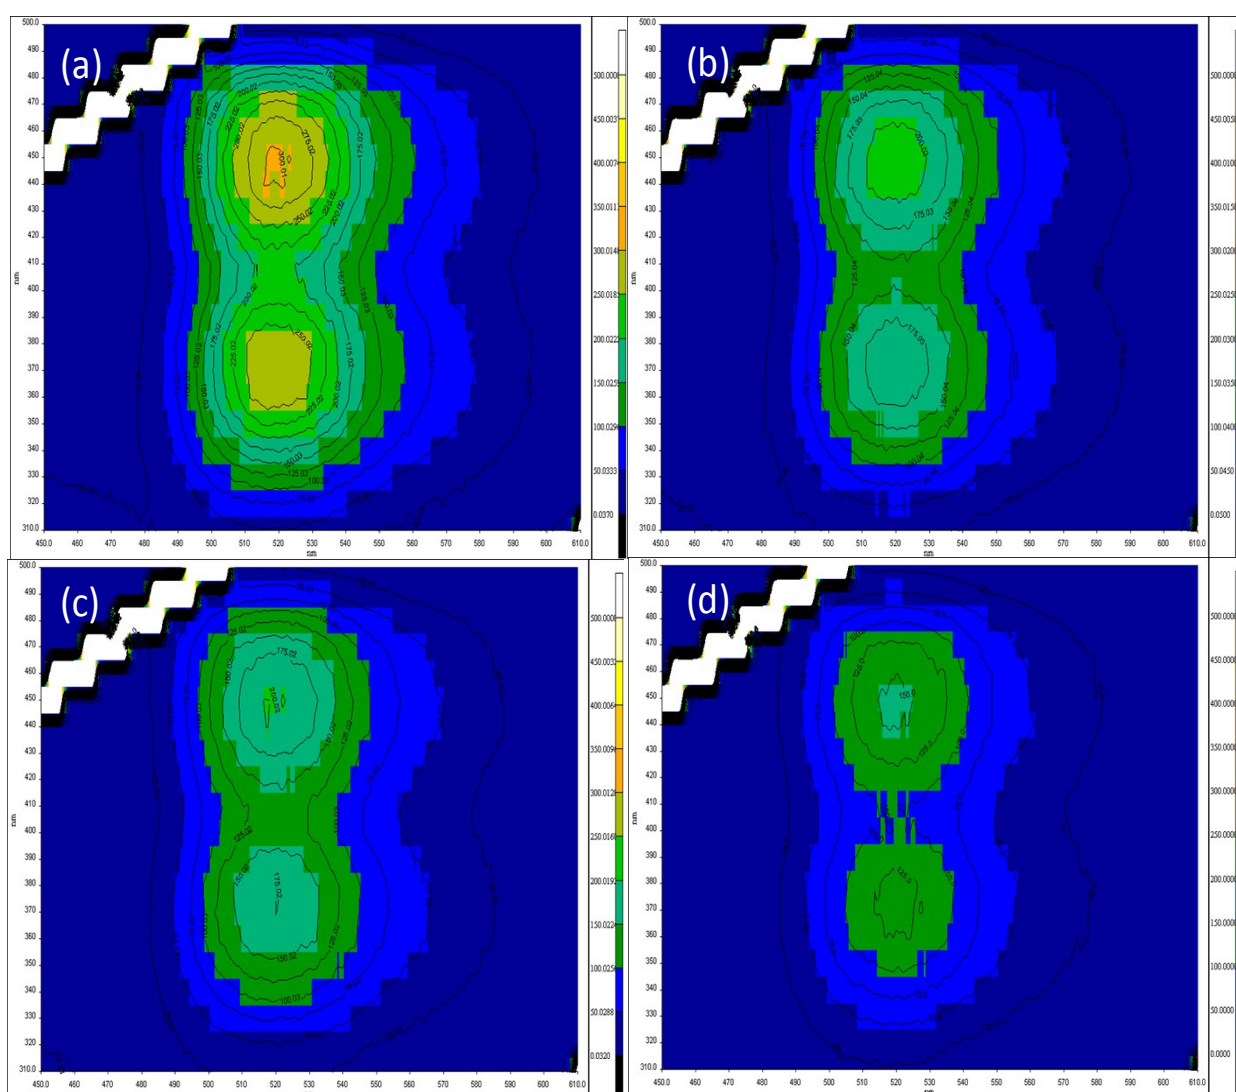

**Figure S1.** Fluorescence contour graphs of vitamin B<sub>2</sub> in the presence of G (0.1 wt.%) dispersions in PEG (0.25 mM) for an ultrasonication power of 320 W and times of 1.0 (a), 2.0 (b), 5.0 (c) and 10.0 (d) min.

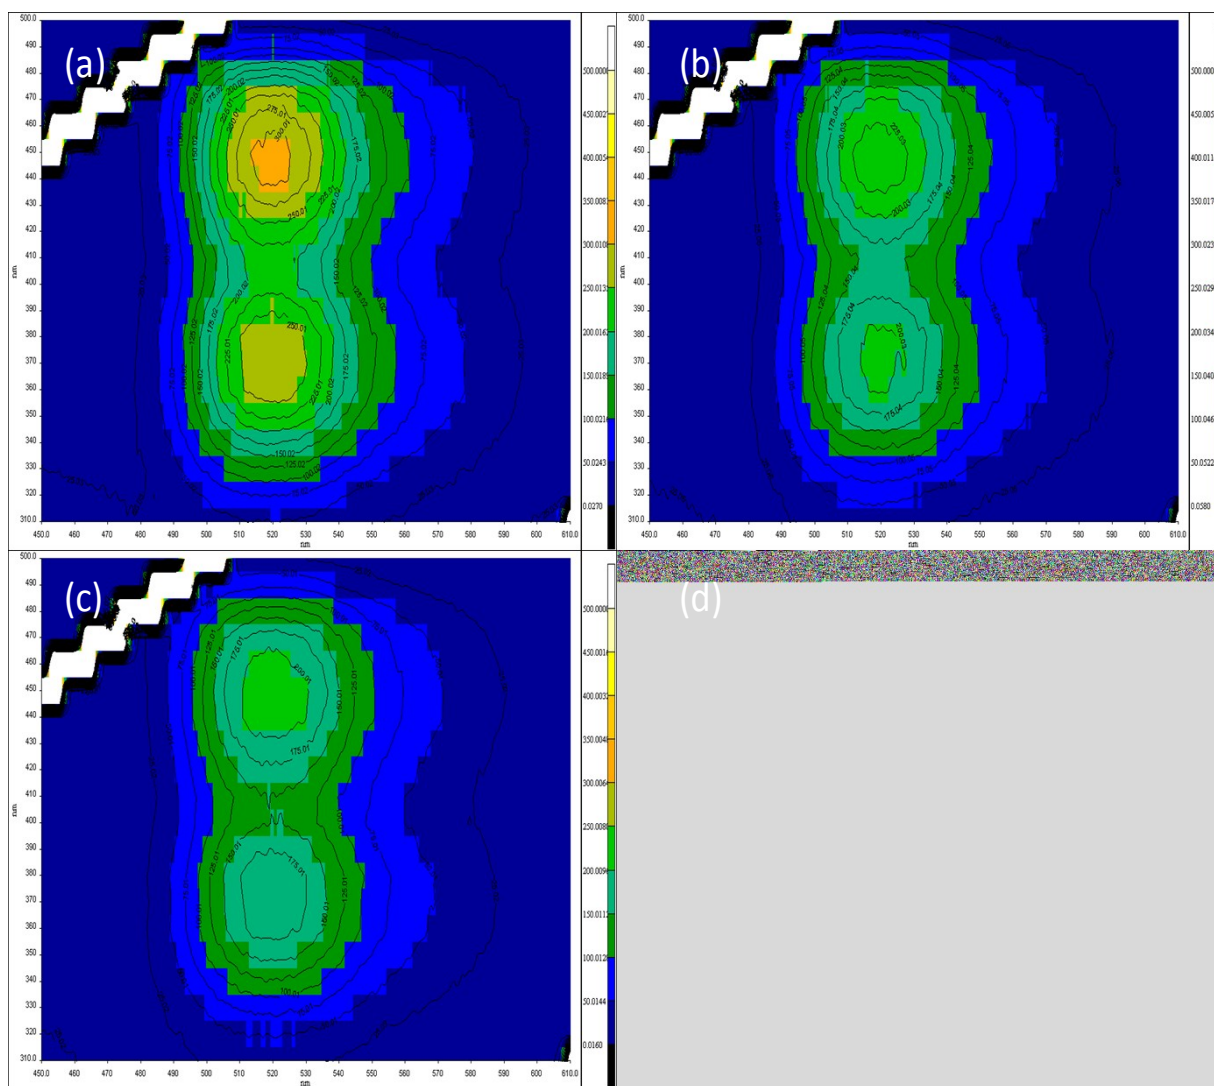

**Figure S2.** Fluorescence contour graphs of vitamin B<sub>2</sub> in the presence of G (0.1 wt.%) dispersions in PEG (0.25 mM) for an ultrasonication time of 5 min and powers of 80 (a), 160 (b), 240 (c) and 320 (d) W.

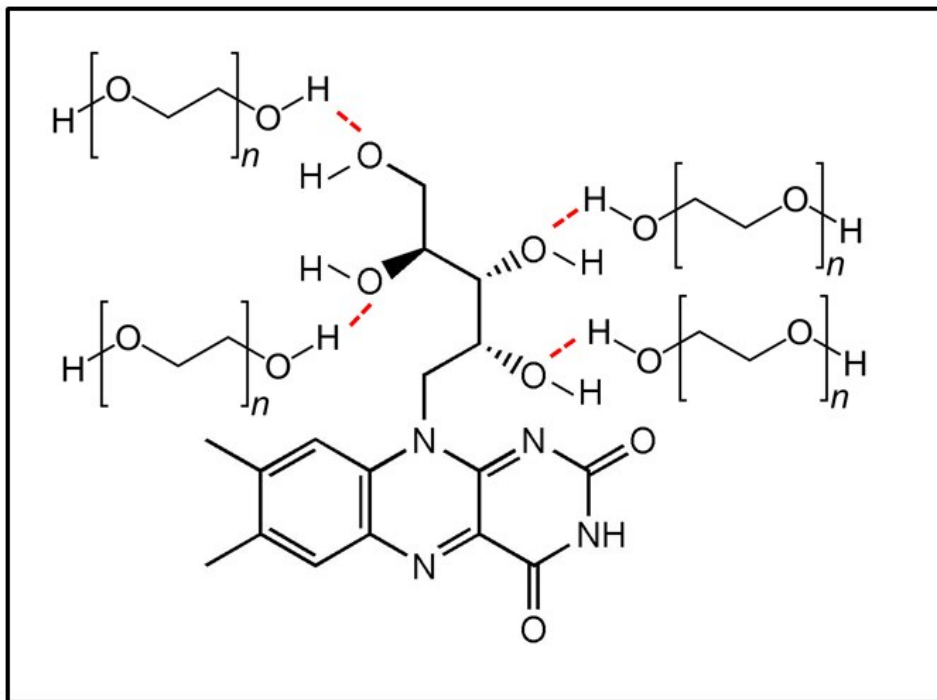

**Fig. S3.** Schematic representation of the H-bonding interactions between the four hydroxyl moieties of the ribityl chain of riboflavin and PEG.

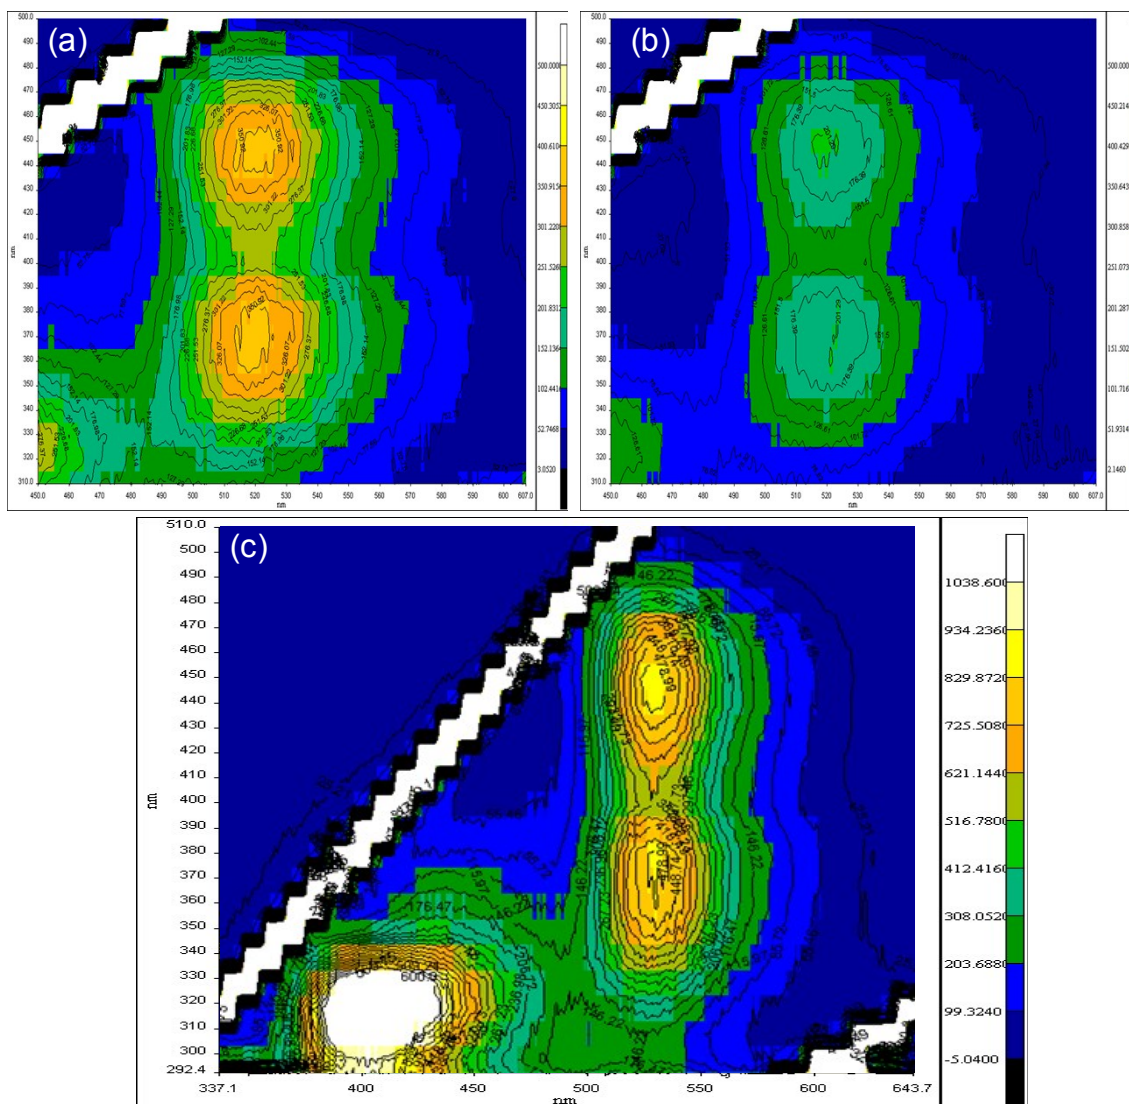

**Figure S4.** Fluorescence contour graphs of commercial multivitamin tablets in PEG (0.25 mM) (a) and G (4.0 wt%) dispersions in PEG (0.25 mM). (c) Whole fluorescence spectrum of the commercial tablets in PEG (0.25 mM). As can be observed, the other components of the sample (vitamins A, E, C, K, D, B<sub>1</sub>, B<sub>6</sub> and B<sub>12</sub>, biotin, folic acid, niacin, and pantothenic acid) do not interfere with the determination of vitamin B<sub>2</sub>.

**Table S1.** Comparison of the analytical features of different methods reported for the determination of vitamin B<sub>2</sub>.

| Matrix                                           | Method                                                               | Recovery (%) | RSD (%) | LOD/LOQ                                                | Ref.      |
|--------------------------------------------------|----------------------------------------------------------------------|--------------|---------|--------------------------------------------------------|-----------|
| whey, milk, buttermilk                           | FLU, pH = 7.0                                                        | 95–102       | NA      | NA                                                     | (1)       |
| pharmaceutical samples                           | FLU, $\lambda_{\text{ex}}=450\text{nm}$                              | NA           | 0.7     | 30 $\mu\text{g L}^{-1}$ / NA                           | (2)       |
| pharmaceutical samples                           | SFS in AOT micelles, $\Delta\lambda=74\text{ nm}$                    | NA           | 1.3     | 9 $\mu\text{g L}^{-1}$ / NA                            | (2)       |
| multivitamin tablet                              | Quenching of FLU with G in PEG $\lambda_{\text{ex}}=310\text{ nm}$   | 96.5         | 1.5–3.1 | 0.03 $\mu\text{g mL}^{-1}$ / 0.1 $\mu\text{g mL}^{-1}$ | This work |
| cereals, vitamin tablets                         | LED-IF in surfactants, $\lambda_{\text{ex}}=450\text{-}500\text{nm}$ | 91.3–100     | ~2      | NA / 0.2 $\mu\text{g mL}^{-1}$                         | (3)       |
| —                                                | FRET□, $\lambda_{\text{ex}}=320\text{ nm}$ , pH = 4                  | NA           | NA      | 0.6 $\mu\text{g mL}^{-1}$ / NA                         | (4)       |
| milk, vitamin drink                              | FRET□, $\lambda_{\text{ex}}=340\text{ nm}$ , pH = 7.4                | 98–118       | NA      | 170 nM/ NA                                             | (5)       |
| powdered infant milk                             | HPLC + UV-Vis                                                        | > 96         | 3.3     | 0.1 $\mu\text{g mL}^{-1}$ / 0.25 $\mu\text{g mL}^{-1}$ | (6)       |
| baby food, cereals, fruit                        | RP-HPLC + UV-Vis                                                     | 70.3         | 1.6     | 0.03 $\mu\text{g mL}^{-1}$ / NA                        | (7)       |
| baby food, milk, cereals                         | RP-HPLC + FLU, $\lambda_{\text{ex}}=422\text{ nm}$                   | >89          | 5–13    | NA                                                     | (8)       |
| beef, pork loin, pig liver.                      | RP-HPLC + FLU, $\lambda_{\text{ex}}=450\text{ nm}$                   | 89.5         | <5.0    | < 1.35 $\text{mg kg}^{-1}$                             | (9)       |
| milk, baby formula, liver, pork, broccoli, flour | RP-HPLC + FLU, $\lambda_{\text{ex}}=468\text{ nm}$                   | 77–81        | 4.7     | 0.003 $\mu\text{g mL}^{-1}$ / 0.1 $\text{mg kg}^{-1}$  | (10)      |
| urine                                            | ILC                                                                  | >87.5        | <9.0    | 40 $\text{ng mL}^{-1}$ / NA                            | (11)      |
| pharmaceutical samples                           | MLC + UV-Vis                                                         | NA           | <3.3    | 3 $\text{ng mL}^{-1}$ / NA                             | (12)      |
| urine, pharmaceutical samples                    | UV-Vis                                                               | 94.8 – 103.7 | 1.5–5.8 | 0.2 $\text{ng mL}^{-1}$ / NA                           | (13)      |
| soybean meal, cereals                            | Microbiological assay with <i>L. rhamnosus</i>                       | NA           | 4–16    | NA                                                     | (14)      |
| milk infant formulae                             | Biosensor assay using Biacore Kits                                   | 103.6        | 1.73    | 0.85 $\mu\text{g g}^{-1}$ / NA                         | (15)      |
| milk-based products                              | Biosensor assay based on SPR                                         | NA           | <5.0    | 70 $\mu\text{g L}^{-1}$ / 234 $\mu\text{g L}^{-1}$     | (16)      |
| beverage, tea, urine                             | CE + LIF                                                             | 94.3–105     | 1.9–4.5 | 3.0 nM / NA                                            | (17)      |
| wine, milk, yoghurt, eggs                        | CE + LIF                                                             | >90.0        | 2.6     | 0.5 $\mu\text{g L}^{-1}$ / NA                          | (18)      |
| mammalian cells                                  | CE+ LED-IF□, $\lambda_{\text{ex}}=450\text{-}500\text{ nm}$          | 96.0         | ≤ 6.0   | 3.8 nM / 11 nM                                         | (19)      |
| urine                                            | CE+ LED-IF, $\lambda_{\text{ex}}=450\text{-}500\text{ nm}$           | NA           | NA      | 20 $\text{ng mL}^{-1}$ / NA                            | (20)      |

NA: non-available; FLU: fluorescence; SFS: synchronous fluorescence spectrophotometry; AOT: bis-2-ethylhexylsulfosuccinate sodium salt; LED-IF: LED-induced fluorescence detection; FRET: fluorescence resonance energy transfer; HPLC: high-performance liquid chromatography; UV-Vis: ultraviolet-visible spectrophotometry; RP-HPLC: reverse-phase HPLC; ILC: isocratic liquid chromatography; MLC: micellar liquid chromatography; SPR: surface plasmon resonance; CE: capillary electrophoresis

## References

- (1) A. Z. Hodson and L. C. Norris, *J. Biol. Chem.*, 1939, **131**, 621-630.
- (2) L. Garcia, S. Blazquez, M. P. San Andres and S. Vera, *Anal. Chim. Acta*, 2001, **434**, 193-199.
- (3) W. E. Ghann, Studies of Surfactants Effect on Riboflavin Fluorescence and Its Determination in Commercial Food Products and Vitamin Tablets, Electronic Theses and Dissertations, Paper 2000, 2008.
- (4) A. Kundu, S. Nandi, R. K. Layek, and A. K. Nandi, *ACS. Appl. Mater. Interf.*, 2013, **5**, 7392-7399.
- (5) J. Han, H. Y. Zou, M. X. Gao and C. Z. Huang. *Talanta*, 2016, **148**, 279-284.
- (6) S. Albalá-Hurtado, M. T. Veciana-Nogués, M. Izquierdo-Pulido and A. Mariné-Font, *J. Chromatogr. A*, 1997, **778**, 247-253.
- (7) P. Viñas, C. López-Erroz, N. Balsalobre and M. Hernández-Córdoba, *J. Chromatogr. A*, 2003, **1007**, 77-84.
- (8) F. Arella, S. Lahély, J. B. Bourguignon and C. Hasselman, *Food Chem.*, 1996, **56**, 81-86.
- (9) X. Tang, D. A. Cronin and N. P. Brunton, *J. Food Compos. Anal.*, 2006, **19**, 831-837.
- (10) J. Jakobsen, *Food Chem.*, 2008, 106, 1209-1217.
- (11) S. M. Mandal, M. Mandal, A. K. Ghosh and S. Dey. *Anal. Chim. Acta.*, 2009, **640**, 110-113.
- (12) L. Monferrer-Pons, M. E. Capella-Peiró, M. Gil-Agustí and J. Esteve-Romero, *J. Chromatogr. A*, 2003, **984**, 223-231.
- (13) S. Shiri, T. Khezeli, S. Sajjadifar, A. Delpisheh, M. Avazpour and A. Abbasi, *J. Chem.* 2013, **2013**, Article ID 892380 (5pp).
- (14) J. L. Golbach, V. I. Chalova, C. L. Woodward and S. C. Ricke, *J. Food Compos. Anal.*, 2007, **20**, 568-574.
- (15) Y. Gao, F. Guo, S. Gokavi, A. Chow, Q. Sheng and M. Guo, *Food Chem.*, 2008, **110**, 769-776.
- (16) I. Caelen, A. Kalman and L. Wahlström, *Anal. Chem.* 2004, **76**, 137-143.
- (17) L. Hu, X. Yang, C. Wang, H. Yuan and D. Xiao, *J. Chromatogr. B*, 2007, **856**, 245-251.

- (18) T. R. I. Cataldi, N. Donatella, E. D. B. Giuseppe and A. B. Sabino, *J. Chromatogr. A*, 2002, **968**, 229–239.
- (19) J. Hühner, A. Ingles-Prieto, C. Neusüß, M. Lämmerhofer and H. Janovjak, *Electrophoresis*. 2015, **36**, 518-525.
- (20) A-K. Su and C.-H. Lin, *J. Chromatogr. B*, 2003, **785**, 39–46.
